# Supplementary material for: Selection and characterisation of weakly coordinating solvents for semiconductor electrodeposition
Source: Royal Society of Chemistry journal article supplement (doi:10.1039/d2cp00696k), 2022-01-01
Supplement: d2cp00696k8.pdf [file d2cp00696k8.pdf]

## Supporting information

# Selection and Characterisation of Weakly Coordinating Solvents for Semiconductor Electrodeposition

Alexander W. Black<sup>a</sup> and Philip N. Bartlett.<sup>\*a</sup>

School of Chemistry, University of Southampton, Southampton, SO17 1BJ, UK.

Table S1: Kamlet and Taft parameters of weakly coordinating solvents, common electrochemical solvents and typical ionic liquids.

| Solvent                                           | Abbreviation                           | Code | $\pi^*$ | $\alpha$ | $\beta$ | Ref.                                                                        |
|---------------------------------------------------|----------------------------------------|------|---------|----------|---------|-----------------------------------------------------------------------------|
| Dichloromethane                                   | DCM                                    |      | 0.82    | 0.13     | 0.10    | [1]                                                                         |
| Trifluorotoluene                                  | TFT                                    |      | 0.64    | 0        | 0       | [2]                                                                         |
| o-dichlorobenzene                                 | oDCB                                   |      | 0.80    | 0        | 0.03    | [1]                                                                         |
| p-fluorotoluene                                   | pFT                                    |      | 0.60    | 0        | 0.11    | $\pi^*$ estimated from Eq. 25 in [3].<br>$\alpha, \beta$ estimated from [4] |
| Chlorobenzene                                     | CB                                     |      | 0.71    | 0.07     | 0       | [1]                                                                         |
| 1,2-dichloroethane                                | DCE                                    |      | 0.81    | 0.10     | 0       | [1]                                                                         |
| Water                                             | -                                      | a    | 1.09    | 1.17     | 0.47    | [1]                                                                         |
| Dimethyl sulphoxide                               | DMSO                                   | b    | 1.00    | 0        | 0.76    | [1]                                                                         |
| Dimethylformamide                                 | DMF                                    | c    | 0.88    | 0        | 0.69    | [1]                                                                         |
| Ethylene glycol                                   | EG                                     | d    | 0.92    | 0.90     | 0.52    | [1]                                                                         |
| Propylene carbonate                               | PC                                     | e    | 0.90    | 0        | 0.38    | [1]                                                                         |
| Acetonitrile                                      | ACN                                    | f    | 0.75    | 0.19     | 0.4     | [1]                                                                         |
| Tetrahydrofuran                                   | THF                                    | g    | 0.58    | 0        | 0.55    | [1]                                                                         |
| Dimethoxyethane                                   | DME                                    | h    | 0.53    | 0        | 0.41    | [1]                                                                         |
| 1-butyl-3-methylimidazolium tetrafluoroborate     | [bmim][BF <sub>4</sub> ]               | i    | 1.05    | 0.63     | 0.38    | [5]                                                                         |
| 1-butyl-3-methylimidazolium triflate              | [bmim][TfO]                            | j    | 1.01    | 0.63     | 0.46    | [5]                                                                         |
| 1-butyl-2,3-dimethylimidazolium tetrafluoroborate | [bm <sub>2</sub> im][BF <sub>4</sub> ] | k    | 1.08    | 0.40     | 0.36    | [5]                                                                         |

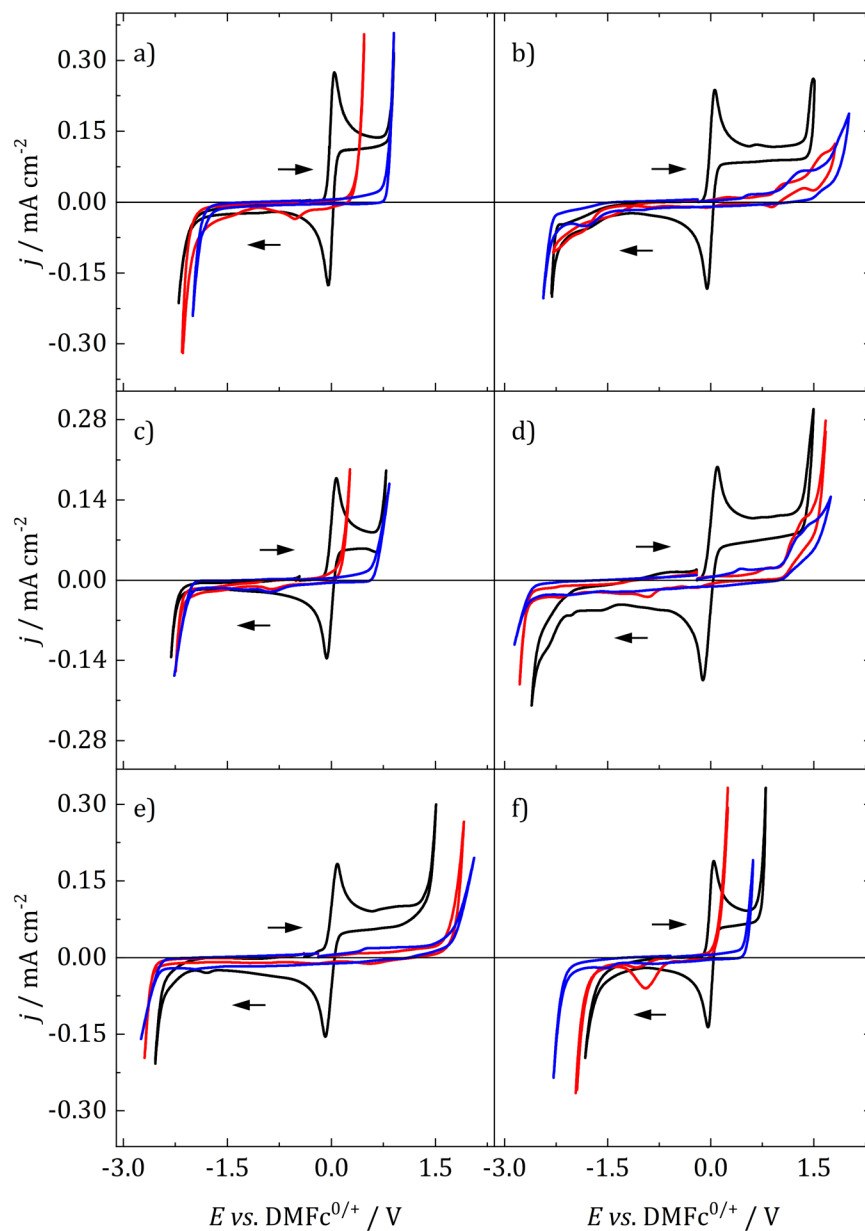

Figure S1: Voltammograms to determine the solvent windows of solvents at various electrode materials with 1 mM DMFc, 100 mM a), c), f):  $[\text{N}^n\text{Bu}_4]\text{Cl}$  and b), d), e):  $[\text{N}^n\text{Bu}_4][\text{BF}_4]$ . Scan swept from -0.5 V vs. DMFc at  $50 \text{ mV s}^{-1}$  in the direction indicated by the arrows. CE: Pt mesh, RE: Ag/AgCl. a): DCM, b): TFT, c): oDCB, d): pFT, e): CB, f): DCE. Black:  $r = 0.25$  mm Pt WE, red:  $r = 0.25$  mm Au, blue:  $r = 1.5$  mm glassy carbon.

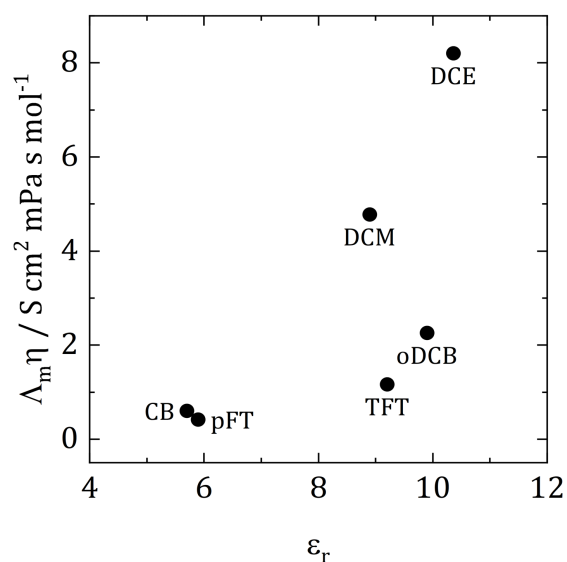

Figure S2: Solvent dependence of  $\Lambda_m \eta$  for 100 mM  $[\text{N}^n\text{Bu}_4][\text{BF}_4]$  at 25°C, with the solvent dielectric constant.

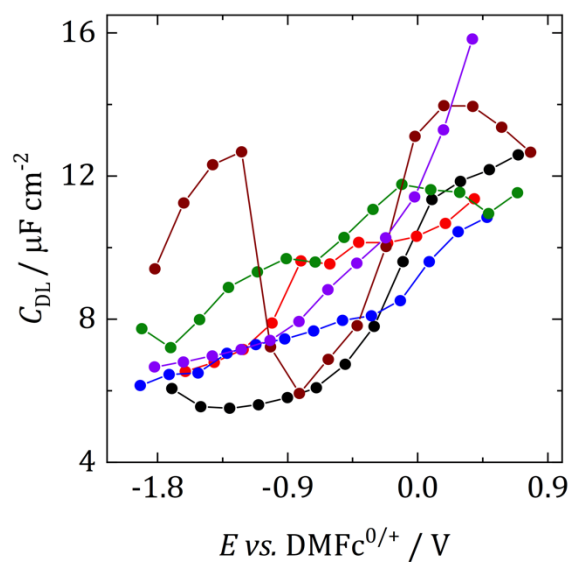

Figure S3: Differential capacitance curves for 100 mM  $[\text{N}^n\text{Bu}_4][\text{BF}_4]$  at a  $r = 0.25$  mm Pt electrode, scanning in the cathodic direction. Black: DCM, red: TFT, blue: oDCB, green: pFT, brown: CB, purple: DCE.

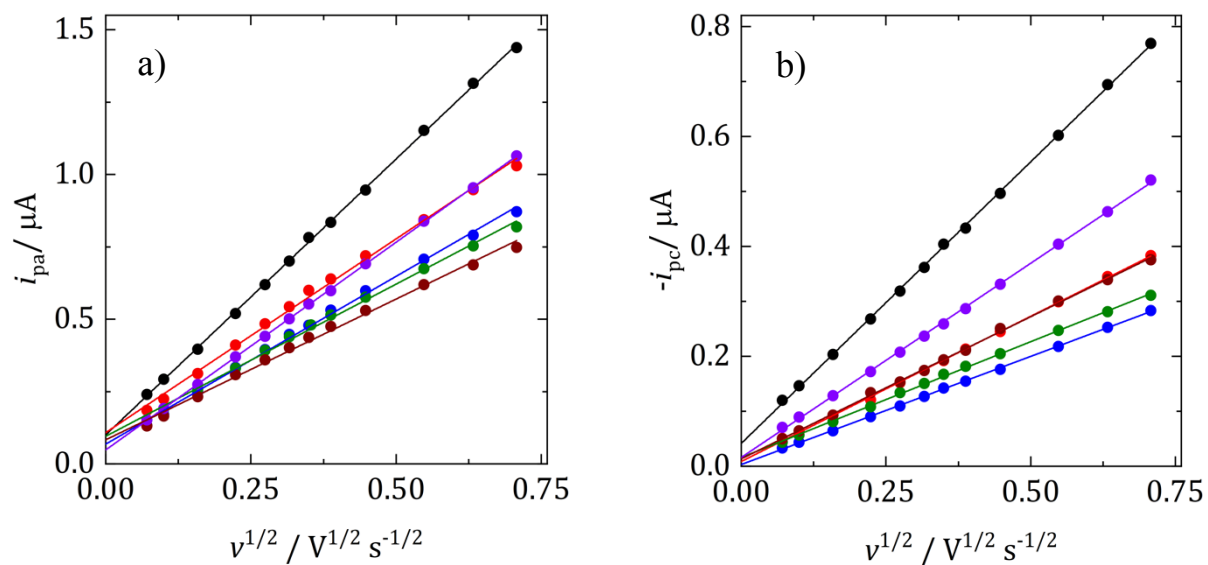

Figure S4: Randles-Sevcik plots for a) 1 mM DMFc and b) 0.5 mM CePF<sub>6</sub> collected at a  $r = 0.25$  mm Pt WE for scan rates between 5-500  $\text{mV s}^{-1}$ . Black: DCM, red: TFT, blue: oDCB, green: pFT, brown: CB, purple: DCE.

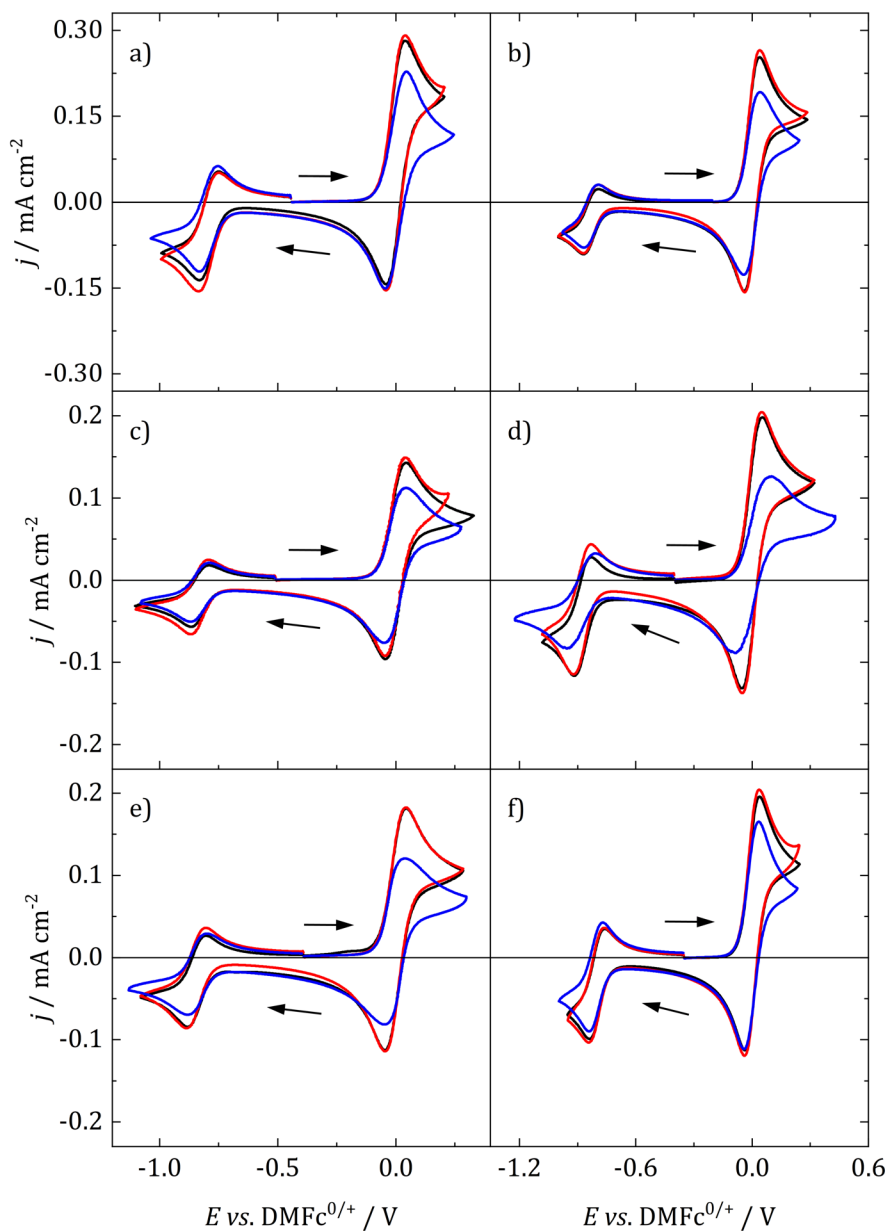

Figure S5:  $iR$  corrected macrodisc CVs for 1 mM DMFc and 0.5 mM CcPF<sub>6</sub> at various electrode materials with 100 mM a), c), f): [N<sup>n</sup>Bu<sub>4</sub>]Cl and b), d), e): [N<sup>n</sup>Bu<sub>4</sub>][BF<sub>4</sub>]. Scan swept from -0.3 V vs. DMFc at 50 mV s<sup>-1</sup> in the direction indicated by the arrows. CE: Pt mesh, RE: Ag/AgCl. a): DCM, b): TFT, c): oDCB, d): pFT, e): CB, f): DCE. Black: Pt WE, red: Au, blue: glassy carbon.

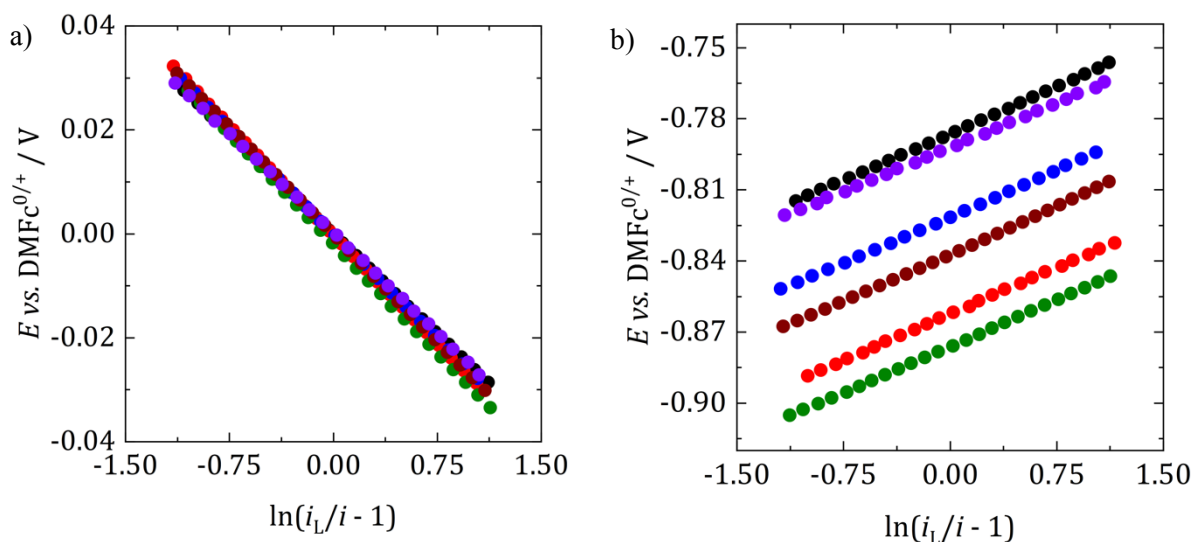

Figure S6: Representative mass transport corrected Tafel plots for a) 1 mM DMFc and b) 0.5 mM CcPF<sub>6</sub> at a  $r = 12.5 \mu\text{m}$  WE at 25 °C. Black: DCM, red: TFT, blue: oDCB, green: pFT, brown: CB, purple: DCE.

| Solvent | $D / 10^{-5} \text{ cm}^2 \text{ s}^{-1}$ |                   |
|---------|-------------------------------------------|-------------------|
|         | DMFc                                      | CcPF <sub>6</sub> |
| DCM     | 1.61(3)                                   | 1.27(3)           |
| TFT     | 1.15(2)                                   | 0.35(3)           |
| oDCB    | 0.51(1)                                   | 0.21(1)           |
| pFT     | 1.06(10)                                  | 0.29(4)           |
| CB      | 0.84(3)                                   | 0.29(2)           |
| DCE     | 0.84(2)                                   | 0.56(2)           |

Table S2: Diffusion coefficients obtained from a potential step at a microelectrode at 25°C. Values the average of three repeats and the error the standard deviation.

## References

- Marcus Y., *Chem. Soc. Rev.*, 1993, **22**, 409–16.
- Stephenson W. K. and Fuchs R., *Can. J. Chem.*, 1985, **63**, 2535–39.
- Kamlet M. J., Abboud J. L. M., Abraham M. H. and Taft R. W., *J. Org. Chem.*, 1983, **48**, 2877–87.
- Hickey J. P. and Passino-Reader D. R., *Environ. Sci. Technol.*, 1991, **25**, 1753–60.
- Crowhurst L., Mawdsley P. R., Perez-Arlandis J. M., Salter P. A. and Welton T., *Phys. Chem. Chem. Phys.*, 2003, **5**, 2790–94.
