# Supplementary figures and images for: Selection and characterisation of weakly coordinating solvents for semiconductor electrodeposition
Source: Royal Society of Chemistry journal article supplement (doi:10.1039/d2cp00696k), 2022-01-01

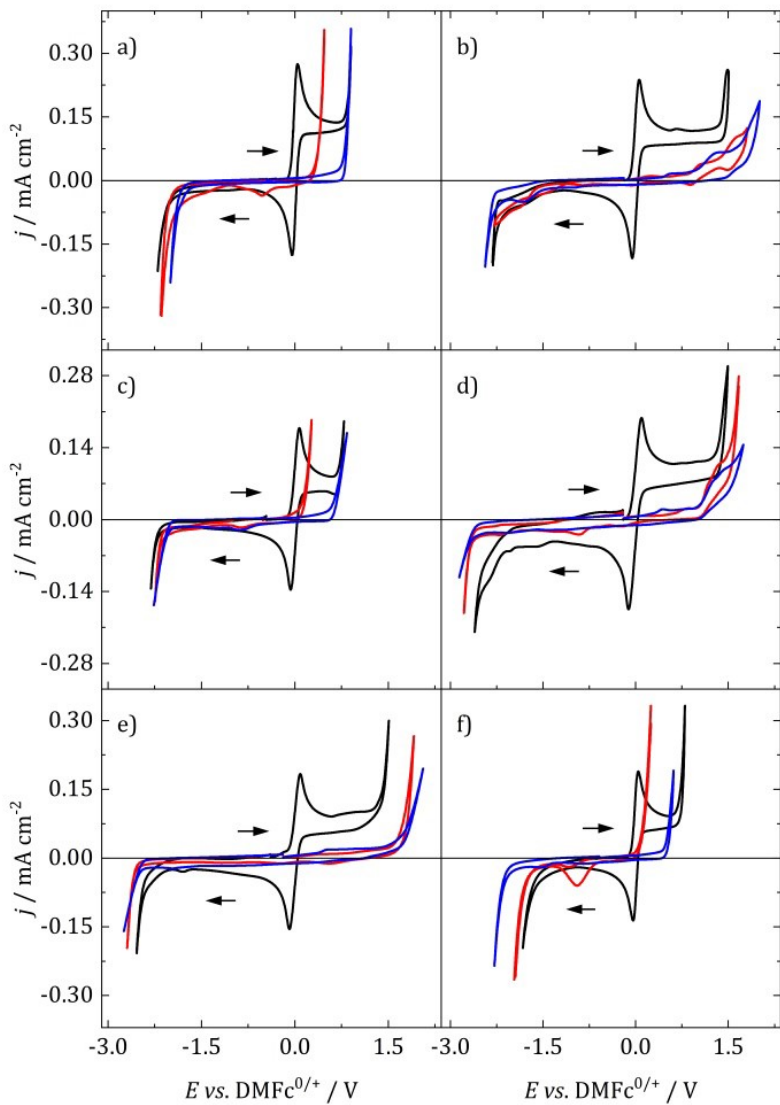

Supplement: d2cp00696k2.pdf [file d2cp00696k2.pdf]

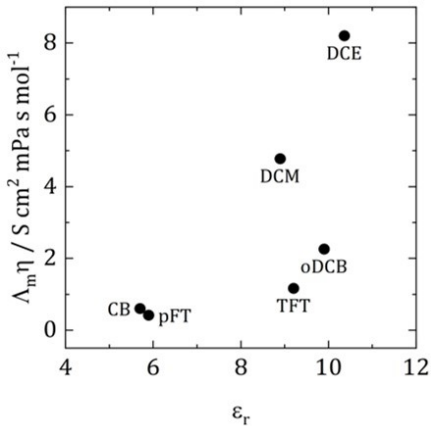

Supplement: d2cp00696k3.pdf [file d2cp00696k3.pdf]

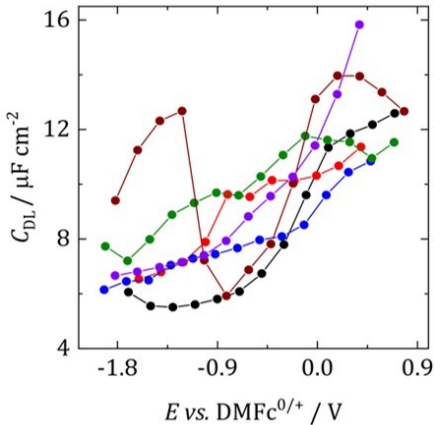

Supplement: d2cp00696k4.pdf [file d2cp00696k4.pdf]

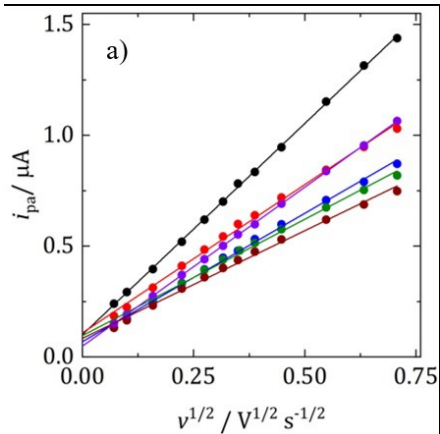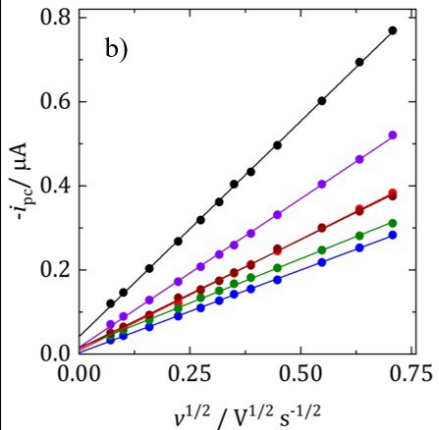

Supplement: d2cp00696k5.pdf [file d2cp00696k5.pdf]

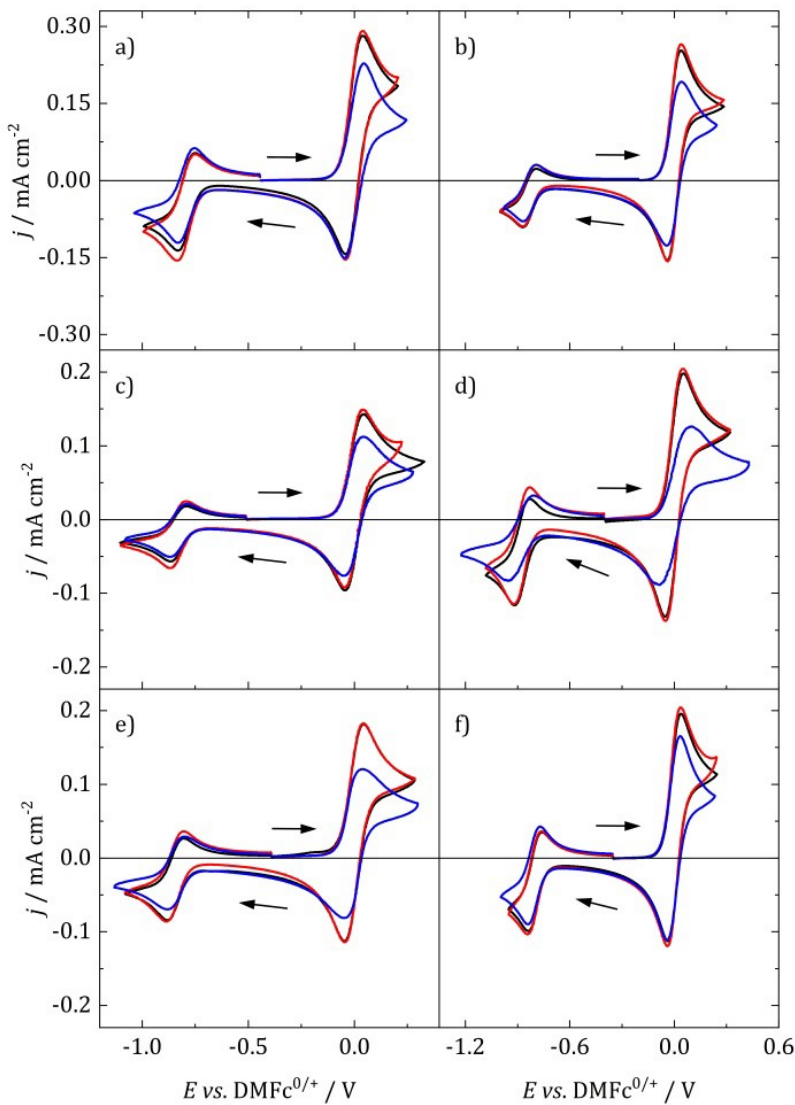

Supplement: d2cp00696k6.pdf [file d2cp00696k6.pdf]

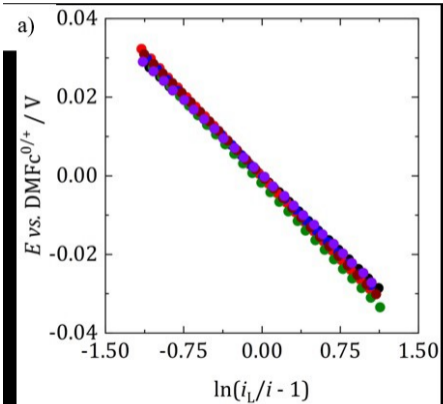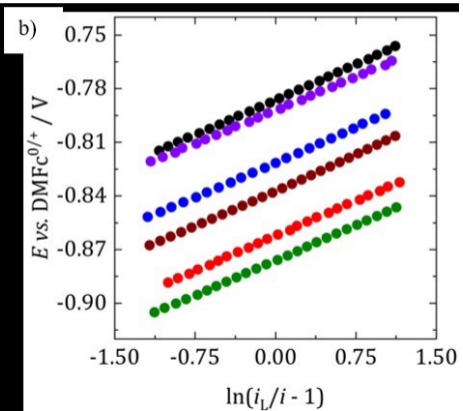

Supplement: d2cp00696k7.pdf [file d2cp00696k7.pdf]
